# Supplementary material
Source: PubMed Central journal article supplement (PMC4160885)

# Poor outcome (mRS 4-6) - All Solitaire

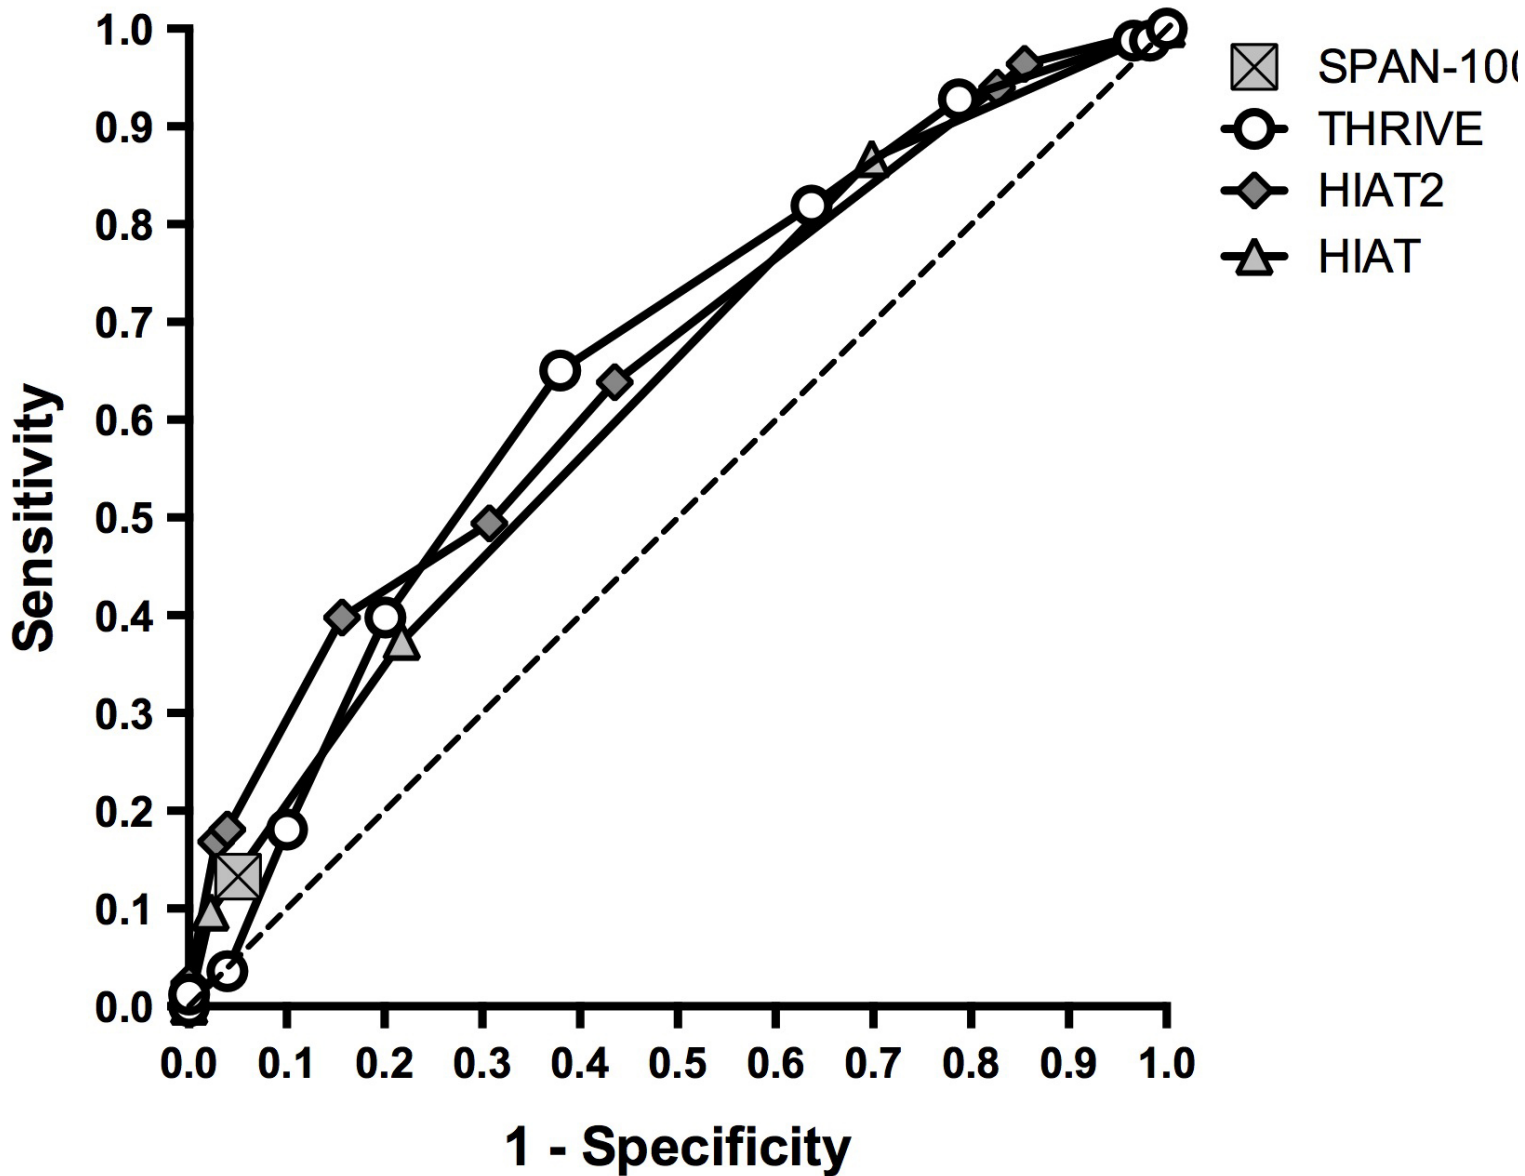

Supplement: NIHMS622345-supplement-Supplement.pdf [file NIHMS622345-supplement-Supplement.pdf]
